# Supplementary material for: Application of Bioelectrical Impedance Analysis (BIA) to Assess Carcass Composition and Nutrient Retention in Rabbits from 25 to 77 Days of Age
Source: MDPI journal article supplement (doi:10.3390/ani12212926), 2022-10-25
Supplement: s1 [file s1]

Table S1. Average values of resistance (Rs), reactance (Xc), impedance (Z), distance between electrodes (D) , animal body length (L) and Body Weight (BW) of the validation group rabbits (n=5) at 25, 35, 49, 63 and 77 days of age

| Age, d | <sup>1</sup> | Rs, $\Omega$ | Xc, $\Omega$ | Z, $\Omega$ | D, cm | L, cm | BW, g |
|--------|--------------|--------------|--------------|-------------|-------|-------|-------|
| 25     | Mean         | 121          | 16.4         | 122         | 10.1  | 18.0  | 370   |
|        | Min          | 89.5         | 10.0         | 90.2        | 6.00  | 12.0  | 196   |
|        | Max          | 169          | 23.5         | 170         | 12.5  | 22.0  | 507   |
|        | SD           | 21.3         | 4.06         | 21.5        | 1.64  | 2.79  | 105   |
| 35     | Mean         | 92.9         | 16.8         | 94.4        | 10.5  | 21.0  | 634   |
|        | Min          | 67.5         | 12.0         | 68.6        | 7.25  | 18.0  | 405   |
|        | Max          | 115          | 19.5         | 116         | 13.0  | 27.0  | 1129  |
|        | SD           | 13.3         | 1.97         | 13.3        | 1.50  | 2.30  | 178   |
| 49     | Mean         | 93.7         | 21.9         | 96.2        | 12.7  | 27.4  | 1220  |
|        | Min          | 81.5         | 18.5         | 83.6        | 10.7  | 26.0  | 926   |
|        | Max          | 109          | 27.0         | 111         | 14.5  | 30.0  | 1436  |
|        | SD           | 10.3         | 2.48         | 10.2        | 1.20  | 1.43  | 178   |
| 63     | Mean         | 101          | 24.5         | 104         | 16.3  | 30.5  | 1912  |
|        | Min          | 54.5         | 20.0         | 60.0        | 14.0  | 25.0  | 1573  |
|        | Max          | 128          | 29.0         | 131         | 18.5  | 35.0  | 2228  |
|        | SD           | 15.6         | 2.45         | 15.3        | 1.39  | 2.02  | 210   |
| 77     | Mean         | 63.0         | 16.2         | 65.0        | 18.5  | 33.8  | 2930  |
|        | Min          | 45.0         | 11.0         | 46.3        | 14.0  | 31.0  | 2090  |
|        | Max          | 95.5         | 25.5         | 98.9        | 21.0  | 39.0  | 3260  |
|        | SD           | 14.6         | 3.89         | 15.1        | 2.04  | 2.38  | 321   |

<sup>1</sup>Min: minimum value; Max: maximum value; SD: standard deviation

Table S2. Average values of resistance (Rs), reactance (Xc), impedance (Z), distance between electrodes (D) , animal body length (L) and Body Weight (BW) of the validation group rabbits (n=5) at 25, 35, 49, 63 and 77 days of age.

| Age, d | <sup>1</sup> | Rs, $\Omega$ | Xc, $\Omega$ | Z, $\Omega$ | D, cm | L, cm | BW, g |
|--------|--------------|--------------|--------------|-------------|-------|-------|-------|
| 25     | Mean         | 130          | 18.5         | 132         | 10.5  | 17.2  | 378   |
|        | Min          | 105          | 14.5         | 106         | 9.00  | 16.0  | 361   |
|        | Max          | 151          | 24.5         | 153         | 12.7  | 19.0  | 392   |
|        | SD           | 21.5         | 3.94         | 21.7        | 1.38  | 1.30  | 135   |
| 35     | Mean         | 95.8         | 18.9         | 97.7        | 10.9  | 21.3  | 644   |
|        | Min          | 80.5         | 14.5         | 81.8        | 9.50  | 20.0  | 630   |
|        | Max          | 114          | 24.0         | 116         | 12.5  | 23.0  | 654   |
|        | SD           | 14.2         | 3.54         | 14.5        | 1.15  | 1.40  | 90.1  |
| 49     | Mean         | 89.2         | 22.0         | 91.9        | 14.2  | 21.3  | 1,291 |
|        | Min          | 87.5         | 21.5         | 90.1        | 13.7  | 20.0  | 1,283 |
|        | Max          | 91.0         | 22.5         | 93.7        | 14.7  | 23.0  | 1,299 |
|        | SD           | 2.47         | 0.71         | 2.57        | 0.71  | 1.39  | 113   |
| 63     | Mean         | 99.3         | 24.3         | 102         | 15.7  | 30.6  | 1,938 |
|        | Min          | 80.5         | 20.5         | 83.1        | 14.5  | 29.0  | 1,911 |
|        | Max          | 113          | 27.0         | 116         | 16.5  | 33.0  | 1,970 |
|        | SD           | 15.2         | 3.06         | 15.4        | 0.86  | 1.52  | 243   |
| 77     | Mean         | 75.2         | 14.5         | 76.7        | 14.2  | 27.7  | 2,985 |
|        | Min          | 57.5         | 11.0         | 59.7        | 13.7  | 25.5  | 2,969 |
|        | Max          | 84.5         | 17.0         | 85.6        | 14.7  | 30.0  | 3,020 |

|    |      |      |      |      |      |     |
|----|------|------|------|------|------|-----|
| SD | 12.3 | 2.64 | 11.7 | 0.71 | 3.18 | 241 |
|----|------|------|------|------|------|-----|

<sup>1</sup>Min: minimum value; Max: maximum value; SD: standard deviation

Table S3. Correlation Matrix between bioelectrical impedance analysis and carcass composition expressed as a percentage of calibration group rabbits ( $n=75$ )<sup>1</sup>.

|                     | Xc,<br>Ω | Rs<br>,<br>Ω | Water,<br>% | Protein,<br>%DM | Fat,<br>%DM | Ash,<br>%DM | Energy,<br>kJ/100<br>g DM | BW, g   | Age, d  | L,<br>cm | D, cm   | Carcass<br>yield,<br>% |
|---------------------|----------|--------------|-------------|-----------------|-------------|-------------|---------------------------|---------|---------|----------|---------|------------------------|
| Xc, Ω               | 1        | 0.35**       | -0.22       | 0.01            | 0.24*       | -0.10       | 0.18                      | 0.16    | 0.08    | -0.05    | 0.30**  | 0.84****               |
| Rs, Ω               |          | 1            | 0.55**      | 0.40***         | -0.44**     | 0.54***     | -0.55**                   | -0.63** | -0.63** | -0.04    | -0.58** | 0.81****               |
| Water, %            |          |              | 1           | 0.88***         | -0.97**     | 0.96***     | -0.98**                   | -0.98** | -0.97** | -0.17    | -0.94** | 0.80****               |
| Protein, %DM        |          |              |             | 1               | -0.93**     | 0.88***     | -0.88**                   | -0.86** | -0.89** | -0.29*   | -0.75** | -0.54****              |
| Fat, %DM            |          |              |             |                 | 1           | -0.93**     | 0.95***                   | 0.95*** | 0.95*** | 0.18     | 0.89*** | -0.36****              |
| Ash, %DM            |          |              |             |                 |             | 1           | -0.99**                   | -0.94** | -0.95** | -0.19    | -0.85** | 0.83****               |
| Energy, kJ/100 g DM |          |              |             |                 |             |             | 1                         | 0.97*** | 0.97*** | 0.16     | 0.90*** | 0.65****               |
| BW, g               |          |              |             |                 |             |             |                           | 1       | 0.99*** | 0.12     | 0.96*** | 0.84****               |
| Age, d              |          |              |             |                 |             |             |                           |         | 1       | 0.21     | 0.93*** | 0.84****               |
| L, cm               |          |              |             |                 |             |             |                           |         |         | 1        | 0.05    | 0.83****               |
| D, cm               |          |              |             |                 |             |             |                           |         |         |          | 1       | -0.41****              |
| Carcass yield, %    |          |              |             |                 |             |             |                           |         |         |          |         | 1                      |

<sup>1</sup>Xc = reactance; Rs = resistance; L = body length; D = distance between internal electrodes. \* $P < 0.05$ ; \*\* $P < 0.01$ ; \*\*\* $P < 0.001$ ; \*\*\*\* $P < 0.0001$ .

Table S4. Regression coefficients and SE for equations determined by MLR for predicting carcass water and protein content expressed as DM percentage and grams ( $n=75$ )

| Dependent variable | Independent variable <sup>1</sup> | Estimate                 | SE                      | P-value | R <sup>2</sup> | rsd <sup>2</sup> | CV   | Pm <sup>3</sup> | Cp <sup>4</sup> |
|--------------------|-----------------------------------|--------------------------|-------------------------|---------|----------------|------------------|------|-----------------|-----------------|
| Water, %           | Intercept                         | 68.8                     | 3.31                    | <0.001  | 0.79           | 1.62             | 2.35 | <0.001          | 2.29            |
|                    | BW <sup>2</sup>                   | -9.55 x 10 <sup>-7</sup> | 1.44 x 10 <sup>-7</sup> | <0.001  |                |                  |      |                 |                 |
|                    | L                                 | -0.16                    | 0.0805                  | 0.05    |                |                  |      |                 |                 |
|                    | Xc                                | 0.68                     | 0.3648                  | 0.06    |                |                  |      |                 |                 |
|                    | Xc <sup>2</sup>                   | -0.019                   | 0.0088                  | 0.04    |                |                  |      |                 |                 |
|                    | vol1                              | 0.06                     | 0.2706                  | 0.05    |                |                  |      |                 |                 |
| Water, g           | Intercept                         | 2.66                     | 2.24                    | 0.91    | 0.99           | 38.6             | 7.23 | <0.001          | 0.92            |
|                    | Age                               | 1.68                     | 1.18                    | 0.16    |                |                  |      |                 |                 |
|                    | BW                                | 0.21                     | 0.043                   | <.001   |                |                  |      |                 |                 |
|                    | BW <sup>2</sup>                   | 3.80 x 10 <sup>-5</sup>  | 8.38 x 10 <sup>-6</sup> | <.001   |                |                  |      |                 |                 |
|                    | vol2                              | 16.7                     | 5.39                    | 0.003   |                |                  |      |                 |                 |
|                    |                                   |                          |                         |         |                |                  |      |                 |                 |
| Protein, %DM       | Intercept                         | 75.2                     | 5.19                    | <0.001  | 0.68           | 3.20             | 5.53 | <0.001          | 2.39            |
|                    | BW                                | 0.0051                   | 0.0018                  | 0.006   |                |                  |      |                 |                 |
|                    | BW <sup>2</sup>                   | -3.22 x 10 <sup>-6</sup> | 5.71 x 10 <sup>-7</sup> | <0.001  |                |                  |      |                 |                 |
|                    | Rs                                | -0.26                    | 0.10                    | 0.01    |                |                  |      |                 |                 |
|                    | Rs <sup>2</sup>                   | 9.75 x 10 <sup>-4</sup>  | 4.94 x 10 <sup>-4</sup> | 0.05    |                |                  |      |                 |                 |
|                    |                                   |                          |                         |         |                |                  |      |                 |                 |
| Protein, g         | Intercept                         | 41.4                     | 27.0                    | 0.13    | 0.99           | 13.2             | 9.16 | <0.001          | 5.32            |
|                    | BW                                | 0.073                    | 0.0098                  | <0.001  |                |                  |      |                 |                 |
|                    | BW <sup>2</sup>                   | 8.84 x 10 <sup>-6</sup>  | 2.73 x 10 <sup>-6</sup> | 0.002   |                |                  |      |                 |                 |
|                    | Xc                                | -4.72                    | 2.77                    | 0.09    |                |                  |      |                 |                 |
|                    | Xc <sup>2</sup>                   | 0.13                     | 0.069                   | 0.07    |                |                  |      |                 |                 |
|                    | vol2                              | 5.77                     | 2.01                    | 0.005   |                |                  |      |                 |                 |

<sup>1</sup>L: body length; Xc: reactance; Rs: resistance; Z: impedance; D: distance between internal electrodes; vol1: D<sup>2</sup>/Rs; vol2: D<sup>2</sup>/Z

<sup>2</sup>rsd = residual SD. <sup>3</sup>Pm = probability of the model. <sup>4</sup> Mallows' Cp statistics [30].

Table S5. Regression coefficients and SE of the equations determined by MLR for predicting carcass ash and fat content expressed as DM percentage and grams ( $n=75$ )

| Dependent variable | Independent variable <sup>1</sup> | Estimate | SE                      | P-value | R <sup>2</sup> | rsd <sup>2</sup> | CV   | Pm <sup>3</sup> | Cp <sup>4</sup> |
|--------------------|-----------------------------------|----------|-------------------------|---------|----------------|------------------|------|-----------------|-----------------|
| Ash, %DM           | Intercept                         | 7.31     | 3.72                    | 0.05    | 0.66           | 1.83             | 11.9 | <0.001          | 2.66            |
|                    | Age                               | 0.15     | 0.050                   | 0.004   |                |                  |      |                 |                 |
|                    | BW                                | -0.0053  | 9.63 x 10 <sup>-4</sup> | <0.001  |                |                  |      |                 |                 |
|                    | Xc                                | 0.93     | 0.37                    | 0.01    |                |                  |      |                 |                 |
|                    | Xc <sup>2</sup>                   | -0.02    | 0.009                   | 0.009   |                |                  |      |                 |                 |
| Ash, g             | Intercept                         | -7.09    | 3.62                    | 0.05    | 0.96           | 5.02             | 14.1 | <0.001          | 1.19            |
|                    | Age                               | 0.19     | 0.11                    | 0.10    |                |                  |      |                 |                 |
|                    | BW                                | 0.02     | 0.003                   | <0.001  |                |                  |      |                 |                 |

|          |                 |                            |                            |        |      |      |      |        |      |
|----------|-----------------|----------------------------|----------------------------|--------|------|------|------|--------|------|
|          | Rs <sup>2</sup> | 1.97 x<br>10 <sup>-4</sup> | 1.59 x<br>10 <sup>-4</sup> | 0.22   |      |      |      |        |      |
|          | vol2            | 1.45                       | 0.66                       | 0.03   |      |      |      |        |      |
| Fat, %DM | Intercept       | 16.9                       | 1.32                       | <0.001 | 0.76 | 3.52 | 14.1 | <0.001 | 4.61 |
|          | BW <sup>2</sup> | 2.41 x<br>10 <sup>-6</sup> | 2.85 x<br>10 <sup>-7</sup> | <0.001 |      |      |      |        |      |
|          | Xc <sup>2</sup> | 0.00796                    | 0.002                      | 0.001  |      |      |      |        |      |
|          | vol1            | -28.9                      | 12.6                       | 0.02   |      |      |      |        |      |
|          | vol2            | 28.8                       | 13.1                       | 0.03   |      |      |      |        |      |
| Fat, g   | Intercept       | 9.73                       | 4.02                       | 0.02   | 0.95 | 19.0 | 24.0 | <0.001 | 0.27 |
|          | BW <sup>2</sup> | 2.94 x<br>10 <sup>-5</sup> | 1.50 x<br>10 <sup>-5</sup> | <0.001 |      |      |      |        |      |
|          | vol1            | -97.4                      | 66.3                       | 0.15   |      |      |      |        |      |
|          | vol2            | 93.6                       | 68.9                       | 0.18   |      |      |      |        |      |

<sup>1</sup>Xc: reactance; Rs: resistance; Z: impedance; D: distance between internal electrodes; vol1: D<sup>2</sup>/Rs; vol2: D<sup>2</sup>/Z  
<sup>2</sup>rsd = residual SD. <sup>3</sup>Pm = probability of the model. <sup>4</sup> Mallows' Cp statistics [30].

Table S6. Regression coefficients and SE of the equations determined by MLR for predicting carcass energy content as kJ/100g DM and MJ and carcass yield expressed as a percentage (*n*=75).

| Dependent variable  | Independent variable <sup>1</sup> | Estimate                   | SE                         | P-value | R <sup>2</sup> | rsd <sup>2</sup> | CV   | Pm <sup>3</sup> | Cp <sup>4</sup> |
|---------------------|-----------------------------------|----------------------------|----------------------------|---------|----------------|------------------|------|-----------------|-----------------|
| Energy, kJ/100 g DM | Intercept                         | 2532                       | 207                        | <0.001  | 0.82           | 102              | 4.59 | <0.001          | 9.90            |
|                     | Age                               | -9.21                      | 2.80                       | 0.002   |                |                  |      |                 |                 |
|                     | BW                                | 0.39                       | 0.05                       | <0.001  |                |                  |      |                 |                 |
|                     | Xc                                | -51.3                      | 20.5                       | 0.01    |                |                  |      |                 |                 |
|                     | Xc <sup>2</sup>                   | 1.47                       | 0.53                       | 0.007   |                |                  |      |                 |                 |
| Energy, MJ          | Intercept                         | 2.42                       | 1.60                       | 0.13    | 0.98           | 0.83             | 13.2 | <0.001          | -0.99           |
|                     | BW <sup>2</sup>                   | 1.82 x<br>10 <sup>-6</sup> | 3.11<br>x10 <sup>-8</sup>  | <0.001  |                |                  |      |                 |                 |
|                     | Xc                                | -0.19                      | 0.17                       | 0.27    |                |                  |      |                 |                 |
|                     | Xc <sup>2</sup>                   | 0.006                      | 0.004                      | 0.19    |                |                  |      |                 |                 |
| Carcass yield, %    | Intercept                         | 50.02                      | 2.61                       | <0.001  | 0.50           | 4.73             | 8.78 | <0.001          | 6.56            |
|                     | BW <sup>2</sup>                   | 1.79 x<br>10 <sup>-6</sup> | 2.20 x<br>10 <sup>-7</sup> | <0.001  |                |                  |      |                 |                 |
|                     | Xc                                | -0.44                      | 0.126                      | <0.001  |                |                  |      |                 |                 |
|                     | Rs <sup>2</sup>                   | 7.41 x<br>10 <sup>-4</sup> | 1.53 x<br>10 <sup>-4</sup> | <0.001  |                |                  |      |                 |                 |

<sup>1</sup>Xc: reactance; Rs: resistance <sup>2</sup>rsd = residual SD. <sup>3</sup>Pm = probability of the model. <sup>4</sup> Mallows' Cp statistics [30].
